# Supplementary material for: The promotional role of Ce in Cu/ZSM-5 and in situ surface reaction for selective catalytic reduction of NOx with NH3
Source: Royal Society of Chemistry journal article supplement (doi:10.1039/c5ra12505g), 2015-01-01
Supplement: c5ra12505g1.pdf [file c5ra12505g1.pdf]

## Supporting information:

### The promotional role of Ce in Cu/ZSM-5 and *in situ* surface reaction for selective catalytic reduction of NO<sub>x</sub> with NH<sub>3</sub>

Shuangshuang Lai, Wangcheng Zhan\*, Yun Guo, Yanglong Guo, Zhigang Zhang,  
Guanzhong Lu\*

Key Laboratory for Advanced Materials and Research Institute of Industrial catalysis,  
East China University of Science and Technology, Shanghai 200237, P. R. China

\* Corresponding authors. Fax: +86 21 64252923. E-mail addresses:  
[gzhlu@ecust.edu.cn](mailto:gzhlu@ecust.edu.cn) (G.Z. Lu) and [zhanwc@ecust.edu.cn](mailto:zhanwc@ecust.edu.cn) (W.C. Zhan)

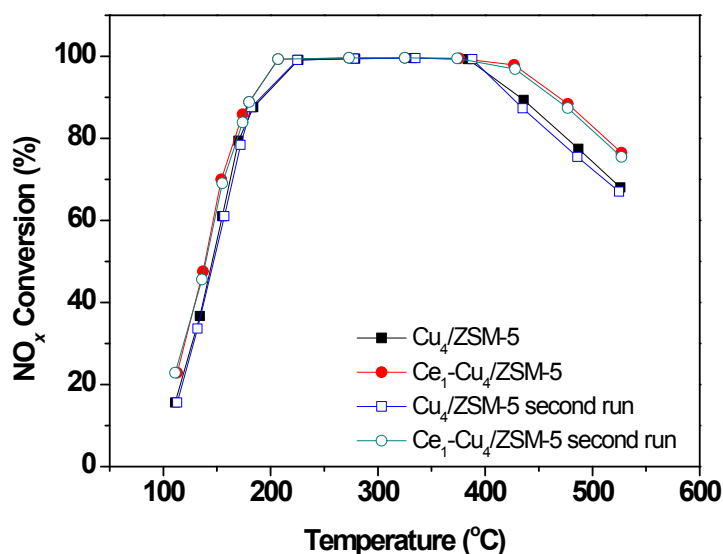

Fig. S1. NO<sub>x</sub> conversion over Cu/ZSM-5 and Ce<sub>x</sub>-Cu<sub>4</sub>/ZSM-5 catalysts for the NH<sub>3</sub>-SCR reaction on the first and second runs. (Reaction conditions: 0.2g catalyst, the reactant gas of 500 ppm NO/500 ppm NH<sub>3</sub>/5%O<sub>2</sub>/Ar balanced, GHSV = 55000 h<sup>-1</sup>). When the first run was finished at about 550 °C, the catalyst was cooled down to room temperature and then evaluated its NH<sub>3</sub>-SCR activity for the second run.

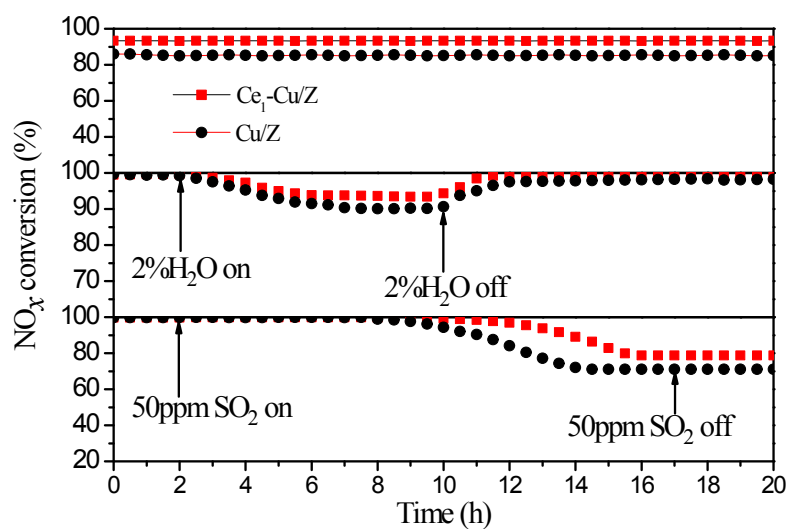

Fig. S2. Effect of SO<sub>2</sub> and H<sub>2</sub>O on the catalytic activities of Cu<sub>4</sub>/ZSM-5 and Ce<sub>1</sub>-Cu<sub>4</sub>/ZSM-5 catalysts for SCR reaction at 450 °C. (Reaction conditions: 0.2 g catalyst, 500 ppm NO, 500 ppm NH<sub>3</sub>, 5% O<sub>2</sub>, Ar to balance, GHSV=55000h<sup>-1</sup>)
